# Supplementary material for: Follicular flushing leads to higher oocyte yield in monofollicular IVF: a randomized controlled trial
Source: PubMed Central journal article supplement — Hum Reprod. 2020 Aug 28;35(10):2253–61. doi: 10.1093/humrep/deaa165 (PMC7518713; doi:10.1093/humrep/deaa165), 2020-08-28
Supplement: deaa165_supplementary_data_figs2.pdf [file deaa165_supplementary_data_figs2.pdf]

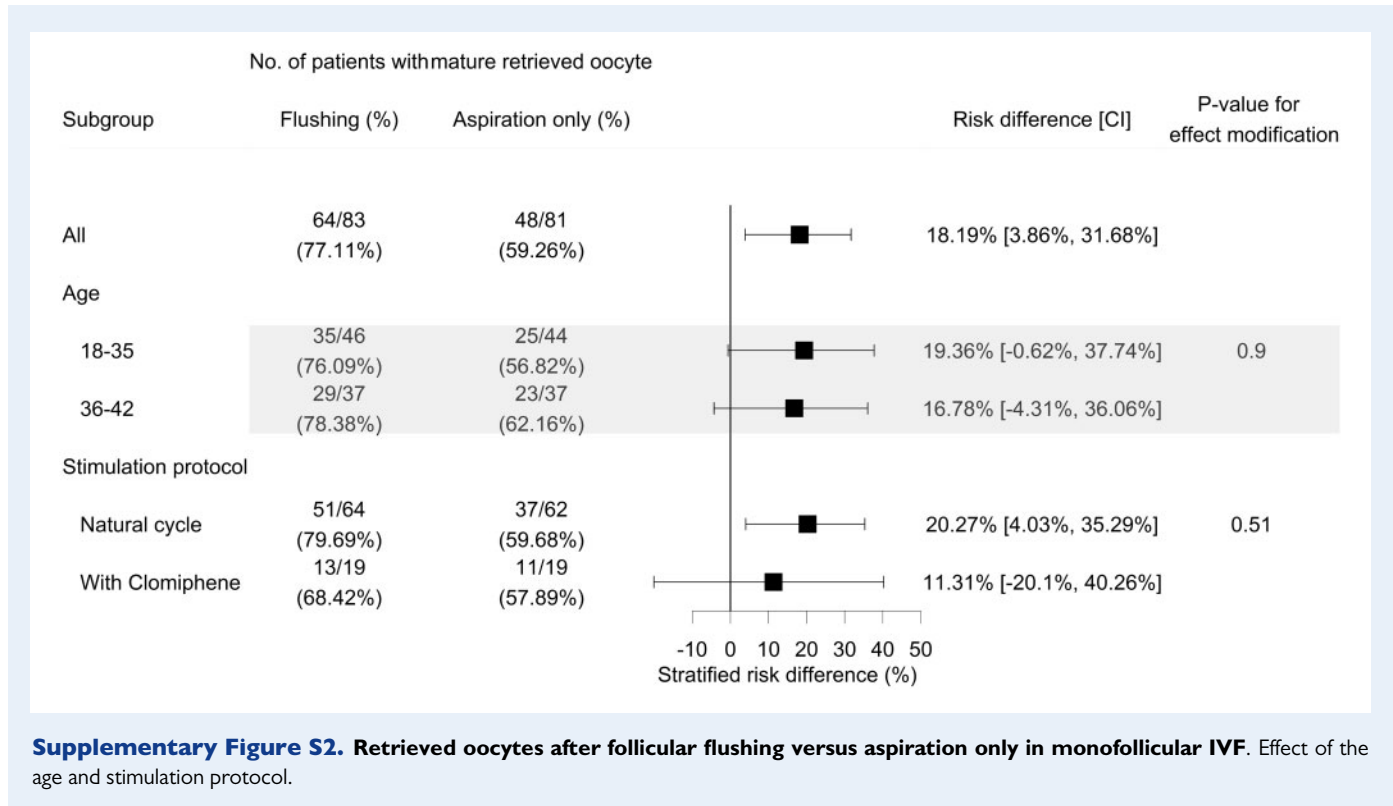

**Supplementary Figure S2. Retrieved oocytes after follicular flushing versus aspiration only in monofollicular IVF.** Effect of the age and stimulation protocol.
